# Supplementary material
Source: ML conference proceedings conference paper supplement (https://openaccess.thecvf.com/content/CVPR_2020/html/Zhao_On_Isometry_Robustness_CVPR_2020_paper.html)
Supplement: Supplementary file 3 [file Zhao_On_Isometry_Robustness_CVPR_2020_supplemental.zip]

Archive with 33 entries (30 files):
- supplementary.pdf
- __MACOSX/
- __MACOSX/._supplementary.pdf
- visual_html/
- visual_html/ModelNet40_rotation_lamp.html
- __MACOSX/visual_html/
- __MACOSX/visual_html/._ModelNet40_rotation_lamp.html
- visual_html/ShapeNet_reflection_pistol.html
- __MACOSX/visual_html/._ShapeNet_reflection_pistol.html
- visual_html/ShapeNet_rotation_laptop.html
- __MACOSX/visual_html/._ShapeNet_rotation_laptop.html
- visual_html/ModelNet40_rotation_plant.html
- __MACOSX/visual_html/._ModelNet40_rotation_plant.html
- visual_html/ShapeNet_reflection_motorbike.html
- __MACOSX/visual_html/._ShapeNet_reflection_motorbike.html
- visual_html/ShapeNet_rotation_airplane.html
- __MACOSX/visual_html/._ShapeNet_rotation_airplane.html
- visual_html/ModelNet40_reflection_car.html
- __MACOSX/visual_html/._ModelNet40_reflection_car.html
- visual_html/ShapeNet_reflection_earphone.html
- __MACOSX/visual_html/._ShapeNet_reflection_earphone.html
- visual_html/ModelNet40_rotation_stairs.html
- __MACOSX/visual_html/._ModelNet40_rotation_stairs.html
- visual_html/ModelNet40_rotation_airplane.html
- __MACOSX/visual_html/._ModelNet40_rotation_airplane.html
- visual_html/ModelNet40_reflection_person.html
- __MACOSX/visual_html/._ModelNet40_reflection_person.html
- visual_html/ModelNet40_reflection_stool.html
- __MACOSX/visual_html/._ModelNet40_reflection_stool.html
- visual_html/ShapeNet_rotation_lamp.html
- __MACOSX/visual_html/._ShapeNet_rotation_lamp.html
- visual_html/ModelNet40_rotation_cone.html
- __MACOSX/visual_html/._ModelNet40_rotation_cone.html
